# Supplementary material for: Development of a chemical separation apparatus for completely automatic cyclic operation
Source: MDPI journal article supplement (doi:10.3390/nu14142973), 1975-06-01
Supplement: s1 [file s1]

## Supporting Information

**Table S1.** Body and organ weight of mice.

| group   | Weight (g) | Organ index (%) |           |           |           |           |
|---------|------------|-----------------|-----------|-----------|-----------|-----------|
|         |            | heart           | liver     | spleen    | lung      | kidney    |
| Control | 23.74±1.67 | 0.53±0.08       | 3.51±0.18 | 0.24±0.03 | 0.59±0.05 | 1.11±0.33 |
| TAU     | 24.70±1.54 | 0.48±0.05       | 3.37±0.15 | 0.26±0.04 | 0.59±0.08 | 1.19±0.10 |
| PHM-H   | 24.47±1.53 | 0.52±0.05       | 3.38±0.24 | 0.26±0.04 | 0.60±0.07 | 1.23±0.05 |
| PHM-L   | 22.91±1.41 | 0.58±0.08       | 3.44±0.16 | 0.26±0.03 | 0.63±0.09 | 1.26±0.07 |
| PHS-H   | 23.66±1.27 | 0.55±0.05       | 3.48±0.08 | 0.23±0.03 | 0.59±0.06 | 1.29±0.07 |
| PHS-L   | 24.51±1.13 | 0.52±0.08       | 3.43±0.12 | 0.25±0.03 | 0.59±0.06 | 1.27±0.08 |

Values are expressed as means ± SD ( $n = 10$ ).

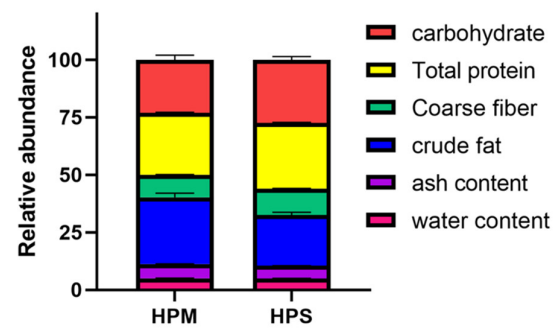

**Figure S1.** Contents of general components of mycelium and spores of *Paecilomyces hepiali*.

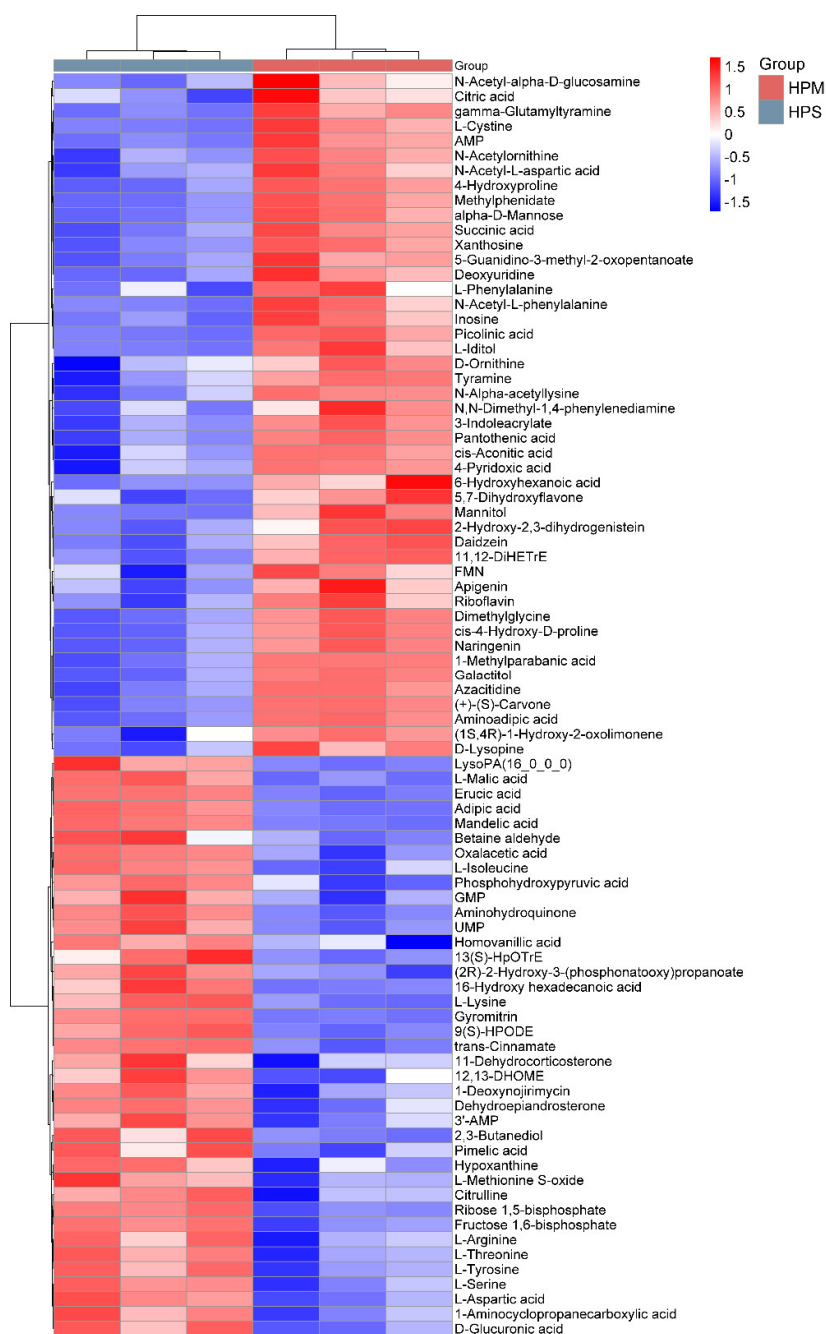

**Figure S2.** Heatmap comparison based on the 85 metabolites with significant differences. The intensity of the color of the heatmap represents the degree of relative abundance.

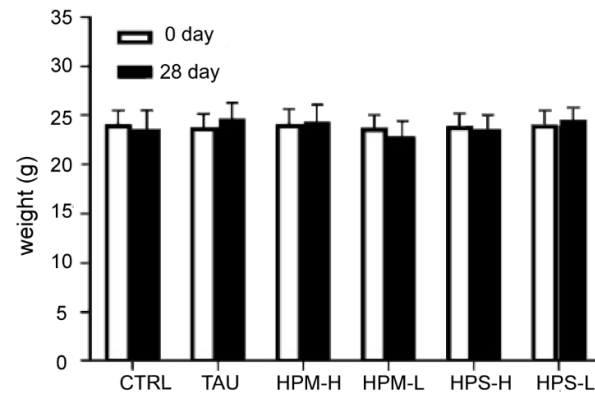

**Figure S3.** The body weight changes of mice on 0 day and 28 day. Data are mean  $\pm$  SD ( $n = 10$  per group).

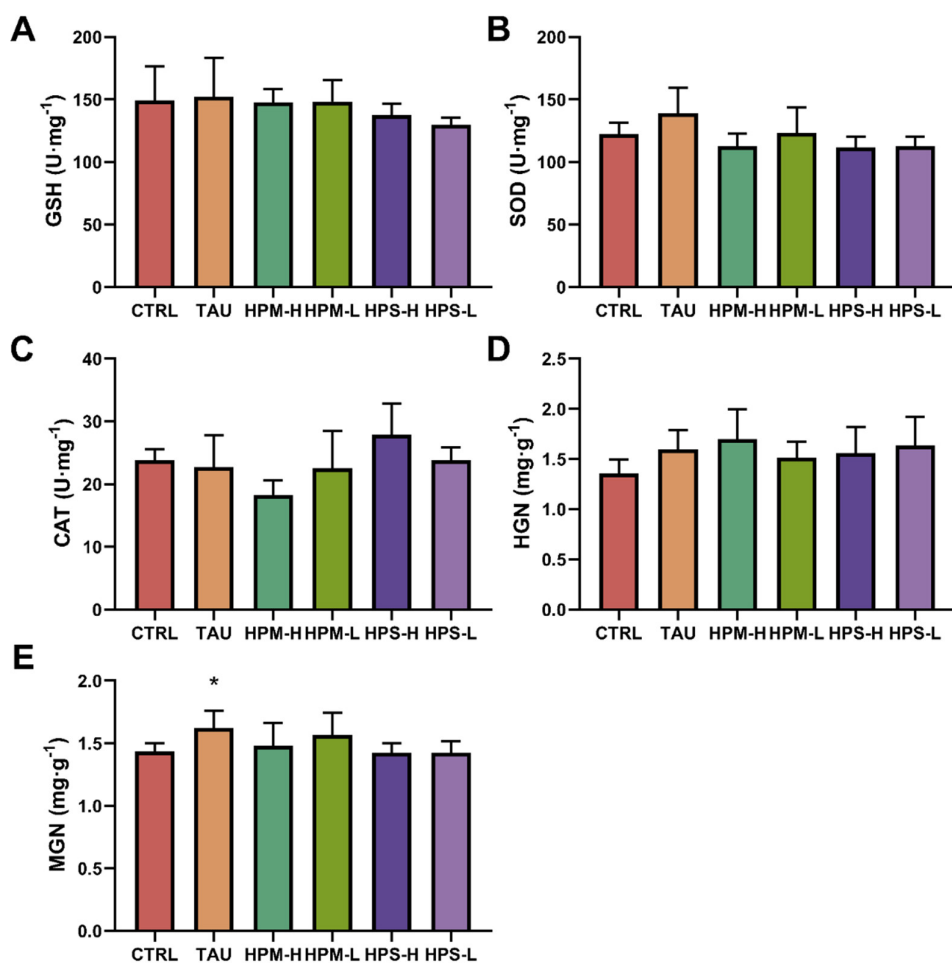

**Figure S4.** The anti-fatigue effect of the HP on mice in each group. (A) Glutathione peroxidase (GSH); (B) Superoxide dismutase (SOD); (C) Catalase (CAT); (D) Hepatic glycogen (HGN); (E) Muscle glycogen (MGN).

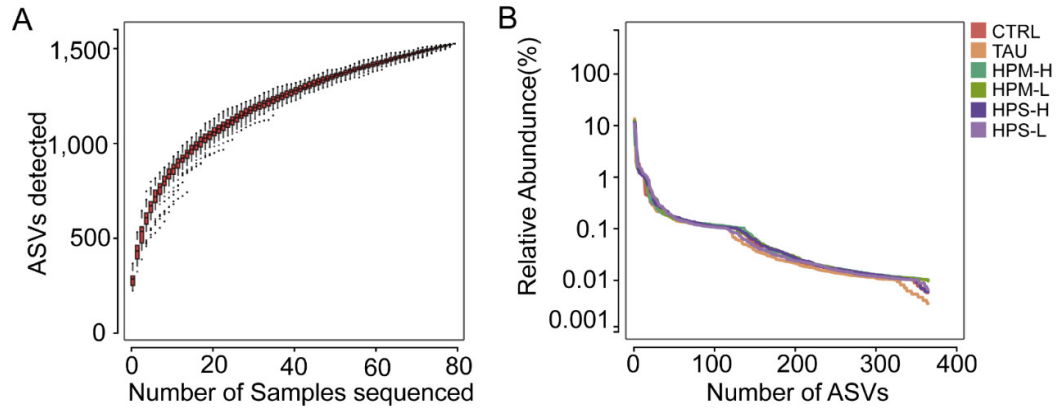

**Figure S5.** Evaluation of sequencing data of the different bacterial community groups. (A) ASVs accumulation curve; (B) Rank abundance curve.

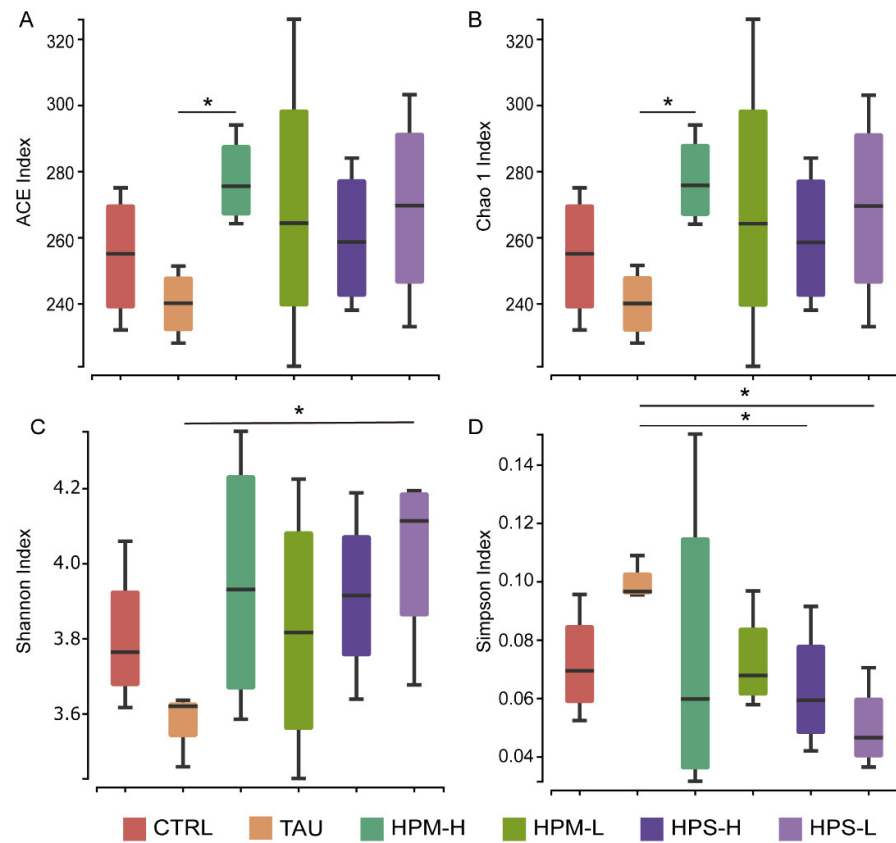

**Figure S6.** Alpha diversity of the gut microbiota. (A) ACE index; (B) Chao 1 index; (C) Shannon index; (D) Simpson index. Asterisk (\*) represents  $p < 0.05$ .

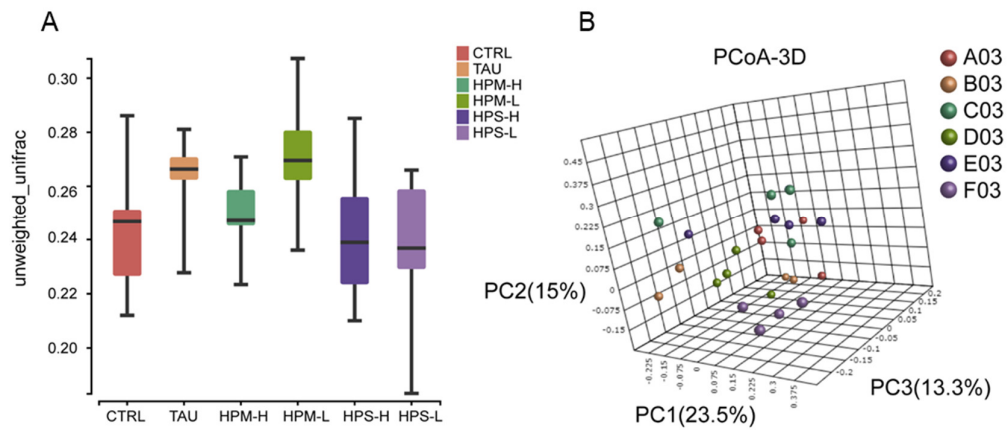

**Figure S7.** Beta diversity of the gut microbiota. (A) The intergroup differences of Beta diversity of the mice gut microbiota; (B) Principal Co-ordinates Analysis (PCoA) of the mice gut microbiota based on Bray–Curtis metrics.



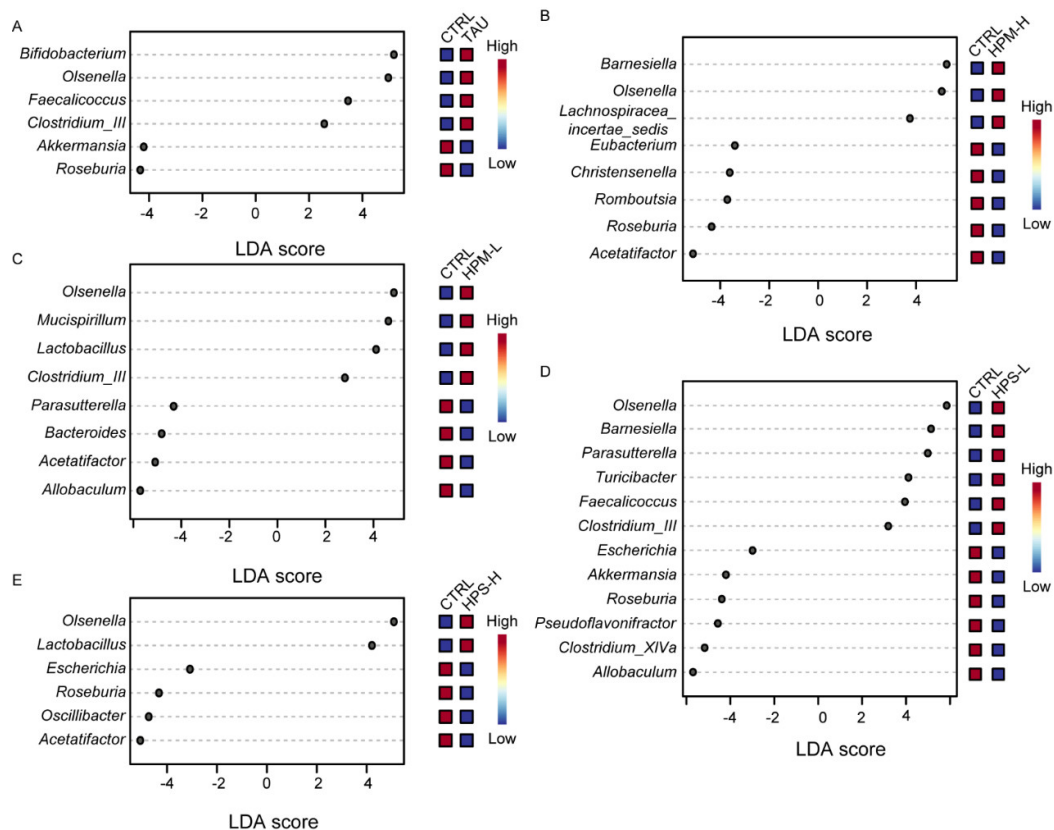

**Figure S8.** Linear discriminant analysis (LDA) scores derived from LEfSe analysis. The biomarker taxa LDA score of  $> 2$  was shown (the length of the bar represents the LDA score). (A) CTRL Vs TAU; (B) CTRL Vs HPM-H; (C) CTRL Vs HPM-L; (D) CTRL Vs HPS-L; (E) CTRL Vs HPS-H.

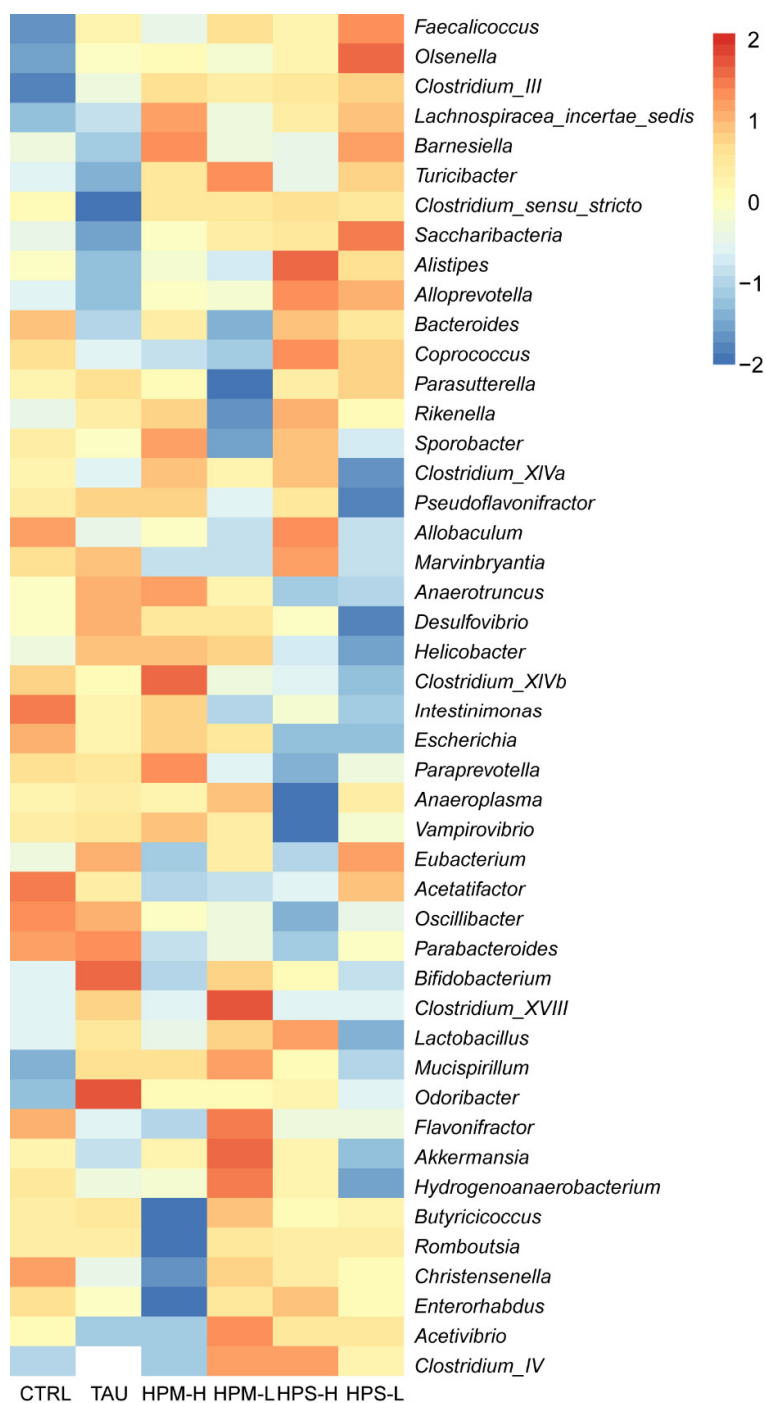

**Figure S9.** Heatmap comparison based on the top relative abundance of 46 key genus. The intensity of the color of the heatmap represents the degree of relative abundance.
